# Supplementary material for: Absorption and Emission Spectroscopic Investigation of Thermal Dynamics and Photo-Dynamics of the Rhodopsin Domain of the Rhodopsin-Guanylyl Cyclase from the Nematophagous Fungus Catenaria anguillulae
Source: Int J Mol Sci. 2017 Oct 5;18(10):2099. doi: 10.3390/ijms18102099 (PMC5666781; doi:10.3390/ijms18102099)
Supplement: Supplementary file 1 [file ijms-18-02099-s001.pdf]

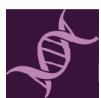

# Supplementary Materials: Absorption and Emission Spectroscopic Investigation of Thermal Dynamics and Photo-Dynamics of the Rhodopsin Domain of the Rhodopsin-Guanylyl Cyclase from the Nematophagous Fungus *Catenaria anguillulae*

Alfons Penzkofer, Ulrike Scheib, Katja Stehfest and Peter Hegemann

## S1. Amino Acid Sequence

The amino acid sequence of the here investigated recombinant synthesized rhodopsin CaRh is displayed in Figure S1. It was added MS at the N-terminus and ENLYFQGVDHHHHHH at the C-terminus to the Rh domain of the full-length CaRhGC protein. Its apoprotein molar mass is  $M_{pr} = 45484.94 \text{ g mol}^{-1}$ . It contains 14 Tyr, 12 Trp, and 26 Phe residues.

|            |            |            |            |             |            |
|------------|------------|------------|------------|-------------|------------|
| 10         | 20         | 30         | 40         | 50          | 60         |
| MSMKDKDNNL | RGACSGCSCP | EYCYSPTSTL | CDDCKCSVTK | HPIVEQPLTR  | NGSFRSSGAS |
| 70         | 80         | 90         | 100        | 110         | 120        |
| LLPSPSQPNI | KVTGSSTASS | NANMRNRQNN | SLSVSNVRST | SSASSSNVSS  | PANSRPGSPS |
| 130        | 140        | 150        | 160        | 170         | 180        |
| KQSALQQYQT | NIADMWSWDM | MLSTPSLKFL | TGQFIMWAIL | TVAGAFYALF  | IQERQAYNRG |
| 190        | 200        | 210        | 220        | 230         | 240        |
| WADIWYGYGA | FGFGIGIAFS | YMGFAGARNP | EKKALSLCLL | GVNIIAFSSY  | ILIMLRLTPT |
| 250        | 260        | 270        | 280        | 290         | 300        |
| IEGTLSPNVE | PARYLEWIAT | CPVLILLISE | ITQADHNAWG | VVFS DYALVV | CGFFGAVLPP |
| 310        | 320        | 330        | 340        | 350         | 360        |
| YPWGNLFNIL | SCAFFSFVVY | SLWRSFTGAI | NGETPCNIEV | NGLRWTRFST  | VTWTFLFPLS |
| 370        | 380        | 390        | 400        | 410         |            |
| WFAFTSGMLS | FTMTEASFTM | IDIGAKVFLT | LVLVNSTVEN | LYFQGVDDHHH | HHH        |

Figure S1. Amino acid sequence of CaRh

## S2. Absorption Cross-Section Determination

The absorption cross-section spectrum shape  $\sigma_{a, \text{CaRh}}(\lambda)$  of CaRh (solid curve in top part of Figure S2) is equal to the absorption coefficient shape  $\alpha_a(\lambda)$  of Figure 1. The absolute absorption cross-section spectrum  $\sigma_{a, \text{CaRh}}(\lambda)$  of CaRh is determined by setting the absorption cross-section of CaRh at  $\lambda = 270 \text{ nm}$  equal to the apoprotein Trp, Tyr, and Phe absorption cross-section contribution  $\sigma_{26F+14Y+12W}(270 \text{ nm})$  and some estimated retinal absorption cross-section contribution [S1]. The involved absorption cross-section spectra of Phe, Tyr, and Trp were taken from [13]. The apoprotein

absorption cross-section spectrum  $\sigma_{26F+14Y+12W}$  of CaRh is shown by the dashed curve in the top part of Figure S2. It was calculated as the sum of the absorption cross-section spectra of 26 Phe, 14 Tyr, and 12 Trp residues present in one apoprotein. The CaRh molecule number density was determined by

$$N_{CaRh} = \frac{\alpha_{a,apo}(270\text{ nm})}{\sigma_{26F+14Y+12W}(270\text{ nm})} = \frac{\alpha_{a,CaRh}(270\text{ nm}) - \alpha_{a,retinal}(270\text{ nm})}{\sigma_{26F+14Y+12W}(270\text{ nm})}, \quad (S1)$$

and the absorption cross-section spectrum of CaRh was set to

$$\sigma_{a,CaRh}(\lambda) = \frac{\alpha_{a,CaRh}(\lambda)}{N_{CaRh}}. \quad (S2)$$

The values used in the calculations were  $\alpha_{a,CaRh}(270\text{ nm}) = 17.22\text{ cm}^{-1}$ ,  $\alpha_{a,retinal}(270\text{ nm}) = 1.8\text{ cm}^{-1}$ , and  $\sigma_{26F+14Y+12W}(270\text{ nm}) = 3.08 \times 10^{-16}\text{ cm}^2$  giving  $N_{CaRh} = 5.01 \times 10^{16}\text{ cm}^{-3}$ .

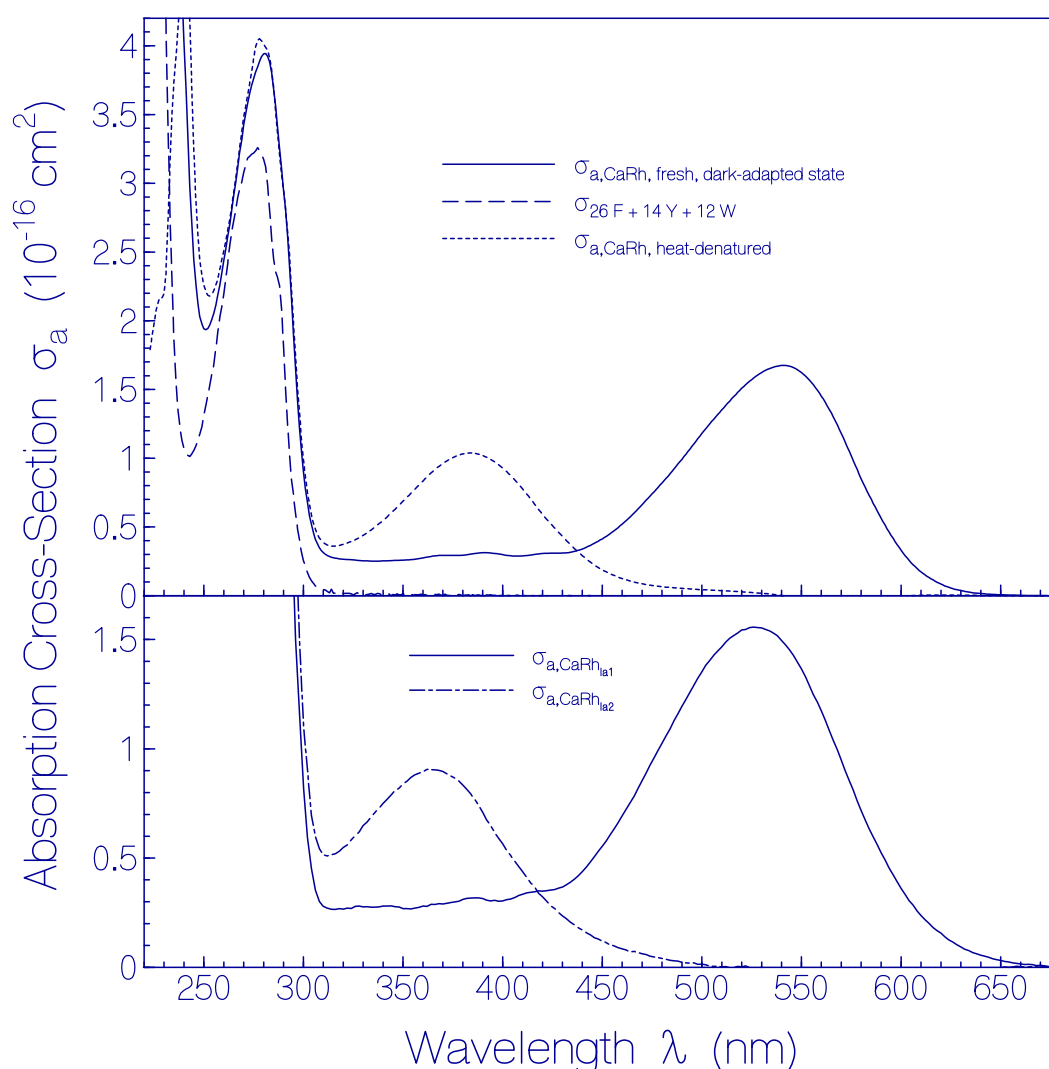

**Figure S2.** Absorption cross-section spectra. Curves are identified by the legends.

The absorption cross-section spectrum  $\sigma_{a,CaRh, \text{fresh, dark-adapted state}}(\lambda > 310\text{ nm})$  is the absorption cross-section spectrum of PRSB in CaRh for  $\lambda > 310\text{ nm}$ . The determination of  $\sigma_{a,CaRh, \text{heat-denatured}}$  is described in section 2.2.1 of the main text. The main band with absorption maximum at 384 nm is

the S<sub>0</sub>-S<sub>1</sub> absorption cross-section band of RSB in heat-denatured CaRh. The absorption cross-section spectrum  $\sigma_{a, \text{CaRh}_{\text{la1}}}(\lambda)$  is the absorption cross-section spectrum of CaRh in its light-adapted ground-state la1 (G<sub>la1</sub>). Its determination is described in section S7.  $\sigma_{a, \text{CaRh}_{\text{la1}}}(\lambda > 310 \text{ nm})$  is caused by the excitation of PRSB<sub>all-trans, la1</sub>. The absorption cross-section spectrum  $\sigma_{a, \text{CaRh}_{\text{la2}}}(\lambda)$  is the absorption cross-section spectrum of CaRh in its light-adapted state la2 (CaRh<sub>la2</sub>). Its determination is described in section S7. The main band with absorption maximum at 365 nm is the S<sub>0</sub>-S<sub>1</sub> absorption cross-section band of RSB<sub>13-cis</sub> in CaRh<sub>la2</sub>.

### S3. Nano-Cluster Size of a Fresh Centrifuged CaRh Sample

The nano-cluster size of fresh CaRh is determined analogous to the description in [6] and [S2]. The scattering cross-section  $\sigma_s$  is obtained from the scattering coefficient  $\alpha_s$  by  $\sigma_s = \alpha_s / N_{\text{CaRh}}$ . For the sample used in Figure 1, at  $\lambda = 632.8 \text{ nm}$  it is  $\alpha_s(\lambda) = \alpha_s(\lambda_0)(\lambda_0 / \lambda)^\gamma = 0.0702 \text{ cm}^{-1}$  ( $\lambda_0 = 800 \text{ nm}$ ,  $\alpha_s(\lambda_0) = 0.046 \text{ cm}^{-1}$ ,  $\gamma = 1.8$ ) and  $\sigma_s(\lambda) = 1.40 \times 10^{-18} \text{ cm}^2$  ( $N_{\text{CaRh}} = 5.01 \times 10^{16} \text{ cm}^{-3}$ ).

The scattering cross-section  $\sigma_s$  is theoretically given by [7]

$$\sigma_s = M_{\text{sca}} \sigma_{R,m} = \beta_m \tilde{M} \sigma_{R,m} \quad (\text{S3})$$

where  $M_{\text{sca}} = \beta_m \tilde{M}$  is the aggregation scattering enhancement factor,  $\beta_m$  is the degree of aggregation (average number of protein molecules per cluster particle),  $\tilde{M}$  is the total Mie scattering function ( $\tilde{M} \leq 1$  decreasing with increasing aggregate size [7]), and  $\sigma_{R,m}$  is the monomer Rayleigh scattering cross-section. The monomer Rayleigh scattering cross-section is given by [7]

$$\sigma_{R,m}(\lambda) = \frac{8\pi}{3} \frac{4\pi^2 n_s^4}{\lambda^4} V_m^2 \left( \frac{n_{pr}^2 - n_s^2}{n_{pr}^2 + 2n_s^2} \right)^2 = \frac{8\pi}{3} \frac{4\pi^2 n_s^4}{\lambda^4} \left( \frac{M_{pr}}{N_A \rho_{pr}} \right)^2 \left( \frac{n_{pr}^2 - n_s^2}{n_{pr}^2 + 2n_s^2} \right)^2. \quad (\text{S4})$$

Thereby  $n_s$  is the refractive index of the solvent (water buffer) at wavelength  $\lambda$ ,  $n_{pr}$  is the refractive index of the protein at wavelength  $\lambda$ ,  $V_m = M_{pr} / (N_A \rho_{pr})$  is the volume of one protein molecule,

$M_{pr}$  is the molar mass of the protein monomer ( $M_{pr} = 45484.94 \text{ g mol}^{-1}$  for CaRh apoprotein),  $N_A = 6.022142 \times 10^{23} \text{ mol}^{-1}$  is the Avogadro constant, and  $\rho_{pr}$  is the mass density of the protein (typical value for proteins is  $\rho_{pr} \approx 1.412 \text{ g cm}^{-3}$  [S3]). These numbers give a protein monomer volume of  $V_m \approx$

$53.49 \text{ nm}^3$  and a protein monomer radius of  $a_m = [3V_m / (4\pi)]^{1/3} \approx 2.34 \text{ nm}$ . At  $\lambda = 632.8 \text{ nm}$  there is  $n_s$

$= 1.332$  and  $n_{pr} \approx 1.589$  [S4] giving  $\sigma_{R,m}(632.8 \text{ nm}) = 2.838 \times 10^{-21} \text{ cm}^2$ . Insertion into Equation (S3) gives

$M_{\text{sca}} = \beta_m \tilde{M} = \sigma_s / \sigma_{R,m} \approx 494$ . The small value of  $\gamma = 1.8$  indicates a small  $\tilde{M}$  and a large cluster volume

$V_{ag} = \beta_m V_m / \kappa_{f,m}$  with small volume fill factor  $\kappa_{f,m}$  [7].

#### S4. Fluorescence Quantum Distribution of Heat-Denatured CaRh

The fluorescence quantum distribution of the heat-denatured CaRh sample of Figure 4 is shown in Figure S3. The corresponding attenuation coefficient spectrum is shown by the thick solid curve in Figure 4a (4 °C, end). Fluorescence excitation occurred at  $\lambda_{F,exc} = 360$  nm.

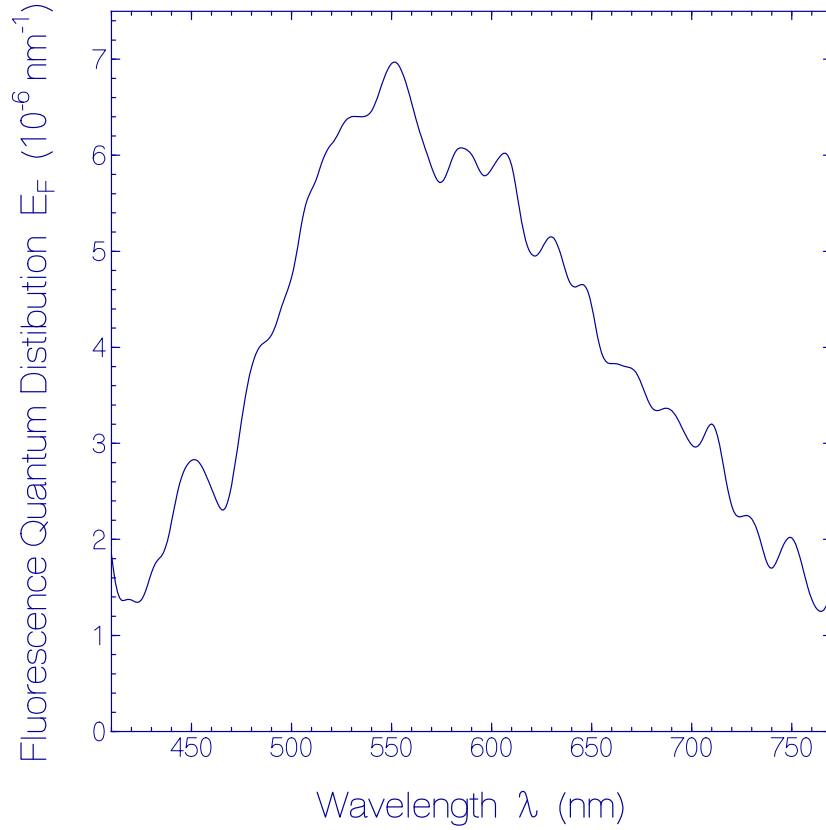

**Figure S3.** Fluorescence quantum distribution of heat-denatured CaRh in pH 7.3 HEPES/MOPS buffer for fluorescence excitation wavelength  $\lambda_{F,exc} = 360$  nm (excitation of RSB, belongs to thick solid curve of attenuation coefficient spectrum shown in Figure 4a).

#### S5. Excitation intensity dependent steady-state attenuation coefficient changes

The attenuation coefficient change  $\delta\alpha(\lambda_{pr}, \lambda_{exc}, I_{exc}) = \alpha_{extremum}(\lambda_{pr}, \lambda_{exc}, I_{exc}) - \alpha(\lambda_{pr}, I_{exc} = 0)$  versus excitation intensity for the excitation wavelengths  $\lambda_{exc} = 530$  nm (LED 530 nm), 590 nm (LED 590 nm) and 470 nm (LED 470 nm) is shown in Figure S4a for  $\lambda_{pr} = 370$  nm and in Figure S4b for  $\lambda_{pr} = 550$  nm. The circles are experimental data. The curves are nonlinear regression fits to the experimental data using the relation [S5]

$$\delta\alpha(\lambda_{pr}, \lambda_{exc}, I_{exc}) = \delta\alpha_0(\lambda_{pr}) \frac{I_{exc} / I_{sat}(\lambda_{exc}, \lambda_{pr})}{1 + I_{exc} / I_{sat}(\lambda_{exc}, \lambda_{pr})}, \quad (S5)$$

with  $\delta\alpha_0$  and  $I_{sat}(\lambda_{exc}, \lambda_{pr})$  listed in the sub-figures. The saturation intensity is inverse proportional to absorption cross-section  $\sigma_a(\lambda_{exc})$  and the absorption recovery time  $\tau_{rec}$  [S5 ].

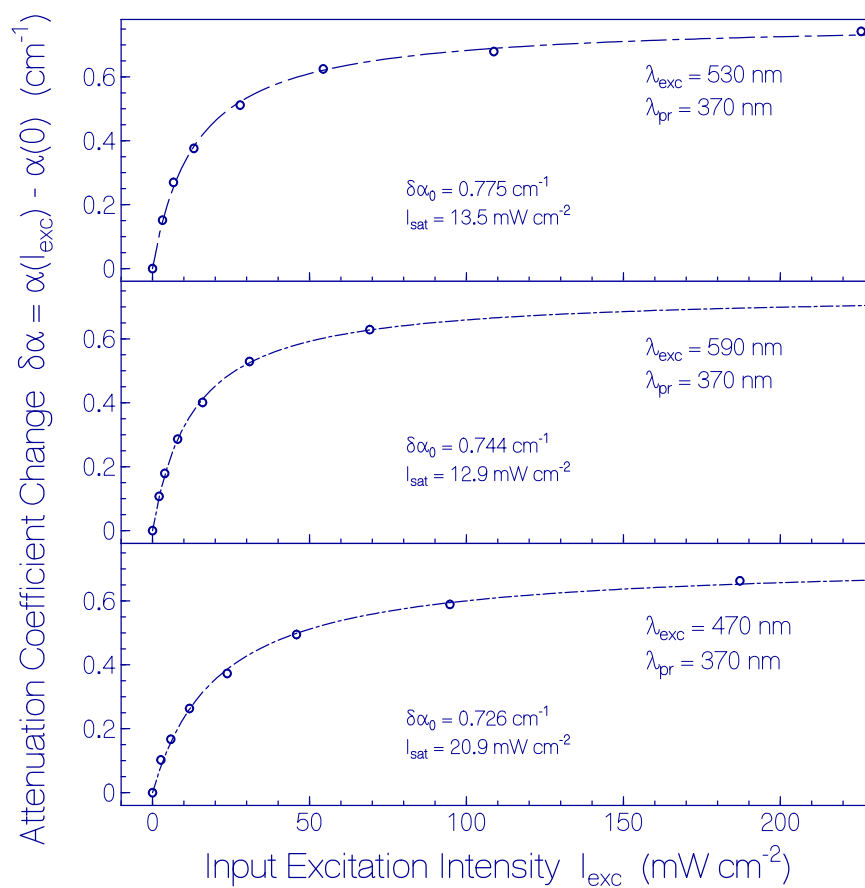

(a)

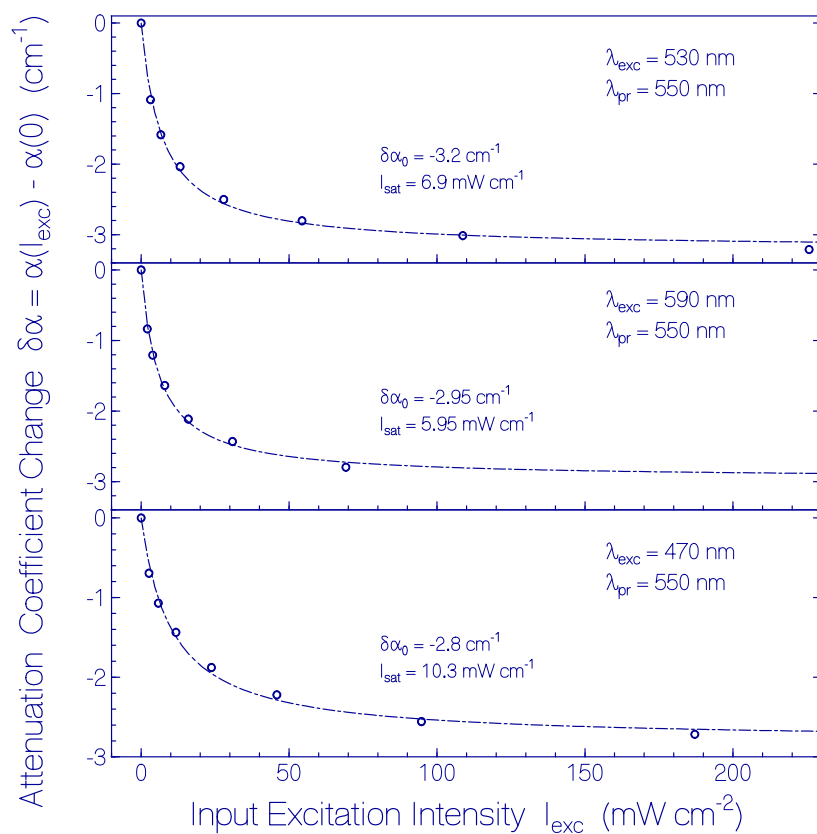

(b)

**Figure S4.** Dependence of attenuation coefficient change  $\delta\alpha(\lambda_{pr}, \lambda_{exc}, I_{exc}) = \alpha_{\text{extremum}}(\lambda_{pr}, \lambda_{exc}, I_{exc}) - \alpha(\lambda_{pr}, I_{exc} = 0)$  of CaRh in pH 7.3 HEPES/MOPS buffer (a) at  $\lambda_{pr} = 370$  nm and (b) at  $\lambda_{pr} = 550$  nm on excitation light intensity  $I_{exc}$  for  $\lambda_{exc} = 530$  nm (top part), 590 nm (middle part), and 470 nm (bottom part). Circles are experimental data. The curves are nonlinear regression fits to the experimental data using the relation  $\delta\alpha(\lambda_{pr}, I_{exc}) = \delta\alpha_0(I_{exc}/I_{sat})/(1 + I_{exc}/I_{sat})$  with  $\delta\alpha_0$  and  $I_{sat}$  listed in the sub-figures.

## S6. Calculation of quantum yield of photo-degradation

The quantum yield of photodegradation  $\phi_d$  is given by

$$\phi_d = \frac{\Delta N_{da}}{\Delta n_{ph,abs}}, \quad (S6)$$

where  $\Delta N_{da}$  is the increment of length-integrated number density of degraded dark-adapted CaRh (Rh-541) and  $\Delta n_{ph,abs}$  is the increment of absorbed excitation photons by light-adapted CaRh (Rh-527).

$\Delta N_{da}$  is given by

$$\Delta N_{da} = \bar{N}_{da} l_{exc} \frac{\Delta\alpha_a(\lambda_{pr})}{\bar{\alpha}_a(\lambda_{pr})} = \frac{\bar{\alpha}_a(\lambda_{pr})}{\sigma_{a,da}(\lambda_{pr})} l_{exc} \frac{\Delta\alpha_a(\lambda_{pr})}{\bar{\alpha}_a(\lambda_{pr})} = l_{exc} \frac{\Delta\alpha_a(\lambda_{pr})}{\sigma_{a,da}(\lambda_{pr})}. \quad (S7)$$

$\bar{N}_{da} = \bar{\alpha}_a(\lambda_{pr}) / \sigma_{a,da}(\lambda_{pr})$  is the average number density of CaRh in the dark-adapted state.

$\bar{\alpha}_a(\lambda_{pr}) = [\alpha_{a, \text{begin of exposure interval}}(\lambda_{pr}) + \alpha_{a, \text{recovered after end of exposure interval}}(\lambda_{pr})] / 2$  is the average absorption coefficient of dark-adapted CaRh at  $\lambda_{pr}$  (here used  $\lambda_{pr} = \lambda_{da,max} = 541$  nm).  $l_{exc}$  is the sample length in excitation direction,  $\Delta\alpha_a(\lambda_{pr}) = \alpha_{a, \text{begin of exposure interval}}(\lambda_{pr}) - \alpha_{a, \text{recovered after end of exposure interval}}(\lambda_{pr})$  is the absorption coefficient change of dark-adapted CaRh at the probe wavelength  $\lambda_{pr}$  due to the photon absorption  $\Delta n_{ph,abs}$  in the considered excitation interval of CaRh in the light-adapted state.

The increment of absorbed excitation photons  $\Delta n_{ph,abs}$  in the considered time increments  $\delta t_{exc}$  is

$$\Delta n_{ph,abs} = \frac{I_{exc} \delta t_{exc}}{h\nu_{exc}} [1 - \exp(-\bar{\alpha}_{a,exc,la} l_{exc})], \quad (S8a)$$

where  $\bar{\alpha}_{a,exc,la}$  is the absorption coefficient of the light-adapted sample (Rh-527 is absorbing) averaged over the spectral distribution of the excitation light source  $g_{LED,i}$  and averaged over excitation time interval  $\delta t_{exc}$ , i.e.,

$$\bar{\alpha}_{a,exc,la} = \frac{\int \alpha_{a, at \delta t_{exc}/2}(\lambda) g_{LED,i}(\lambda) d\lambda}{\int g_{LED,i}(\lambda) d\lambda}. \quad (S8b)$$

## S7. Determination of photocycle parameters

The limiting fraction  $\kappa_{la1}$  of excited  $\text{CaRh}_{da}^*$  converted to  $\text{CaRh}_{la1}$  at high excitation intensity is obtained from the ratio of the absorption coefficient strength of the  $S_0$ - $S_1$  transition of  $\text{CaRh}_{la1}$  at high excitation intensity (dashed curves in Figure 7 for  $t_{exc} = 3$  s) to the initial absorption coefficient strength of the  $S_0$ - $S_1$  transition of  $\text{CaRh}_{da}$  before excitation (solid curves in Figure 7). That is

$$\kappa_{la1} \approx \frac{\int_{S_0-S_1} \frac{\alpha_{a,\text{CaRh}_{la1}}(\lambda, I_{exc} \rightarrow \infty)}{\lambda} d\lambda}{\int_{S_0-S_1} \frac{\alpha_{a,\text{CaRh}_{da}}(\lambda, I_{exc} = 0)}{\lambda} d\lambda}. \quad (\text{S9})$$

( $S_0$ - $S_1$  upper wavelength position in the integration is set to  $\lambda_{upper \text{ limit}} = 430$  nm). Thereby it is assumed that the absorption cross-section strengths of the  $S_0$ - $S_1$  transition of  $\text{CaRh}_{da}$  and  $\text{CaRh}_{la1}$  are approximately equal. The analysis gives  $\kappa_{la1} \approx 0.73$  for  $\lambda_{exc} = 530$  nm, 590 nm, and 470 nm. The limiting fraction  $\kappa_{la2}$  of excited  $\text{CaRh}_{da}^*$  converted to  $\text{CaRh}_{la2}$  is  $\kappa_{la2} = 1 - \kappa_{la1} \approx 0.27$  for  $\lambda_{exc} = 530$  nm, 590 nm, and 470 nm.

Considering the photocycle scheme of Figure 13a and the reaction coordinate scheme of Figure S5 the ratio of  $\kappa_{la2}/\kappa_{la1}$  is given by

$$\frac{\kappa_{la2}}{\kappa_{la1}} = \frac{\phi_{cis} \tau_{rec,la2}}{\phi_{trans} \tau_{rec,la1}} = \frac{\phi_{cis} \tau_{rec,la2}}{(1 - \phi_{cis}) \tau_{rec,la1}}. \quad (\text{S10})$$

The  $\kappa_{la2}$  and  $\kappa_{la1}$  values obtained from Equation (S9) give  $\kappa_{la2}/\kappa_{la1} \approx 0.37$ . Application of Equation (S10) gives  $\kappa_{la2}/\kappa_{la1} = 0.37 \pm 0.13$  using  $\phi_{cis} = 0.46 \pm 0.05$ ,  $\tau_{rec,la2} = 0.35 \pm 0.01$  s and  $\tau_{rec,la1} = 0.8 \pm 0.06$  s.

The absorption coefficient spectrum of  $\alpha_a(\lambda, t_{exc} = 3$  s,  $\lambda_{exc} = 530$  nm,  $I_{exc} = 226$  mW cm<sup>-2</sup>) of Figure 7a is approximately separated in the absorption coefficient contributions  $\alpha_{a,\text{CaRh}_{la1}}(\lambda)$  and  $\alpha_{a,\text{CaRh}_{la2}}(\lambda)$  which are shown by the thick dashed and the thick dotted curves in Figure 7a (shape of  $\alpha_{a,\text{CaRh}_{la2}}(\lambda)$  is taken from initial photo-degradation development of Figure 10). The absorption cross-section spectra of  $\text{CaRh}_{la1}$  and  $\text{CaRh}_{la2}$  are given by  $\sigma_{a,\text{CaRh}_{la1}}(\lambda) = \alpha_{a,\text{CaRh}_{la1}}(\lambda) / N_{\text{CaRh}_{la1}}$  and  $\sigma_{a,\text{CaRh}_{la2}}(\lambda) = \alpha_{a,\text{CaRh}_{la2}}(\lambda) / N_{\text{CaRh}_{la2}}$ . The number density of  $\text{CaRh}_{la1}$  is given by  $N_{\text{CaRh}_{la1}} = N_{\text{CaRh},0} \kappa_{la1} \approx 3.66 \times 10^{16}$  cm<sup>-3</sup>, and the number density of  $\text{CaRh}_{la2}$  is given by  $N_{\text{CaRh}_{la2}} = N_{\text{CaRh},0} \kappa_{la2} \approx 1.35 \times 10^{16}$  cm<sup>-3</sup> ( $N_{\text{CaRh},0} = \alpha_a(541 \text{ nm}, t_{exc} = 0) / \sigma_{a,\text{CaRh}_{da}}(541 \text{ nm}) \approx 5.01 \times 10^{16}$  cm<sup>-3</sup> with  $\alpha_a(541 \text{ nm}, t_{exc} = 0) = 8.4$  cm<sup>-1</sup> of Figure 7a,  $\sigma_{a,\text{CaRh}_{da}}(541 \text{ nm}) = 1.675 \times 10^{-16}$  cm<sup>2</sup>, see top part of Figure S2). The obtained approximate absorption cross-section spectra of  $\text{CaRh}_{la1}$  and  $\text{CaRh}_{la2}$  are shown in the bottom part of Figure S2.

The initial quantum yield of all-*trans* – 13-*cis* photo-isomerization  $\phi_{cis}$  (Figure S5) of  $\text{CaRh}_{da}$  is deduced from the initial light induced absorption change at  $\lambda_{pr} = 550$  nm of middle part of Figure 8a for  $\lambda_{exc} = 590$  nm and  $t_{exc} = 0.0125$  s.  $\phi_{cis}$  is approximately given by

$$\phi_{cis} = \frac{\Delta N_{da}}{\Delta n_{ph,abs}}, \quad (\text{S11})$$

where  $\Delta N_{da}$  is the increment of length-integrated number density of all-*trans* – 13-*cis* isomerized initially dark-adapted  $\text{CaRh}$ , and  $\Delta n_{ph,abs}$  is the increment of absorbed excitation photons by initially dark-adapted  $\text{CaRh}$  (Rh-541).

$\Delta N_{da}$  is given by

$$\Delta N_{da} = N_{da} l_{exc} \frac{\Delta \alpha_a(\lambda_{pr})}{\alpha_a(\lambda_{pr})} = \frac{\alpha_a(\lambda_{pr})}{\sigma_{a,da}(\lambda_{pr})} l_{exc} \frac{\Delta \alpha_a(\lambda_{pr})}{\alpha_a(\lambda_{pr})} = l_{exc} \frac{\Delta \alpha_a(\lambda_{pr})}{\sigma_{a,da}(\lambda_{pr})} \quad (S12)$$

$N_{da} = \alpha_a(\lambda_{pr}) / \sigma_{a,da}(\lambda_{pr})$  is the number density of CaRh in the dark-adapted state.  $\alpha_a(\lambda_{pr})$  is the absorption coefficient of dark-adapted CaRh at  $\lambda_{pr}$  (here used  $\lambda_{pr} = 550$  nm).  $l_{exc}$  is the sample length in excitation direction (here  $l_{exc} = 0.15$  cm),  $\Delta \alpha_a(\lambda_{pr})$  is the absorption coefficient change of dark-adapted CaRh at the probe wavelength  $\lambda_{pr}$  due to the photon absorption  $\Delta n_{ph,abs}$  within  $t_{exc} = 0.0125$  s.

The increment of absorbed excitation photons  $\Delta n_{ph,abs}$  in the considered time increment  $t_{exc}$  is

$$\Delta n_{ph,abs} = \frac{I_{exc} t_{exc}}{h \nu_{exc}} \left[ 1 - \exp(-\bar{\alpha}_{a,da}(\lambda_{exc}) l_{exc}) \right], \quad (S13a)$$

where  $\bar{\alpha}_{a,da}(\lambda_{exc})$  is the absorption coefficient of the dark-adapted sample averaged over the spectral distribution of the excitation light source  $g_{LED590nm}$ , i.e.,

$$\bar{\alpha}_{a,da}(\lambda_{exc}) = \frac{\int \alpha_{a,da}(\lambda) g_{LED590nm}(\lambda) d\lambda}{\int g_{LED590nm}(\lambda) d\lambda}. \quad (S13b)$$

The obtained quantum yield is  $\phi_{cis} = 0.46 \pm 0.05$ . The quantum yield of all-*trans* back-isomerization is  $\phi_{trans} = 1 - \phi_{cis} = 0.54 \pm 0.05$ .

## S8. Schematic Reaction Coordinate Diagrams for Primary and Secondary Photo-Isomerization Cycles of CaRh

A schematic reaction coordinate diagram for the primary photo-isomerization and deprotonation/re-protonation cycle together with the back-*trans* isomerization with protein restructuring of initially dark-adapted CaRh is shown in Figure S5. The reaction coordinate resembles the diheadral angle of the C13=C14 bond of retinal [8,9]. In Figure S6 a schematic reaction coordinate diagram for the secondary photo-isomerization cycle of light-adapted CaRh<sub>la1</sub> (PRSB<sub>all-trans,la1</sub>) is depicted.

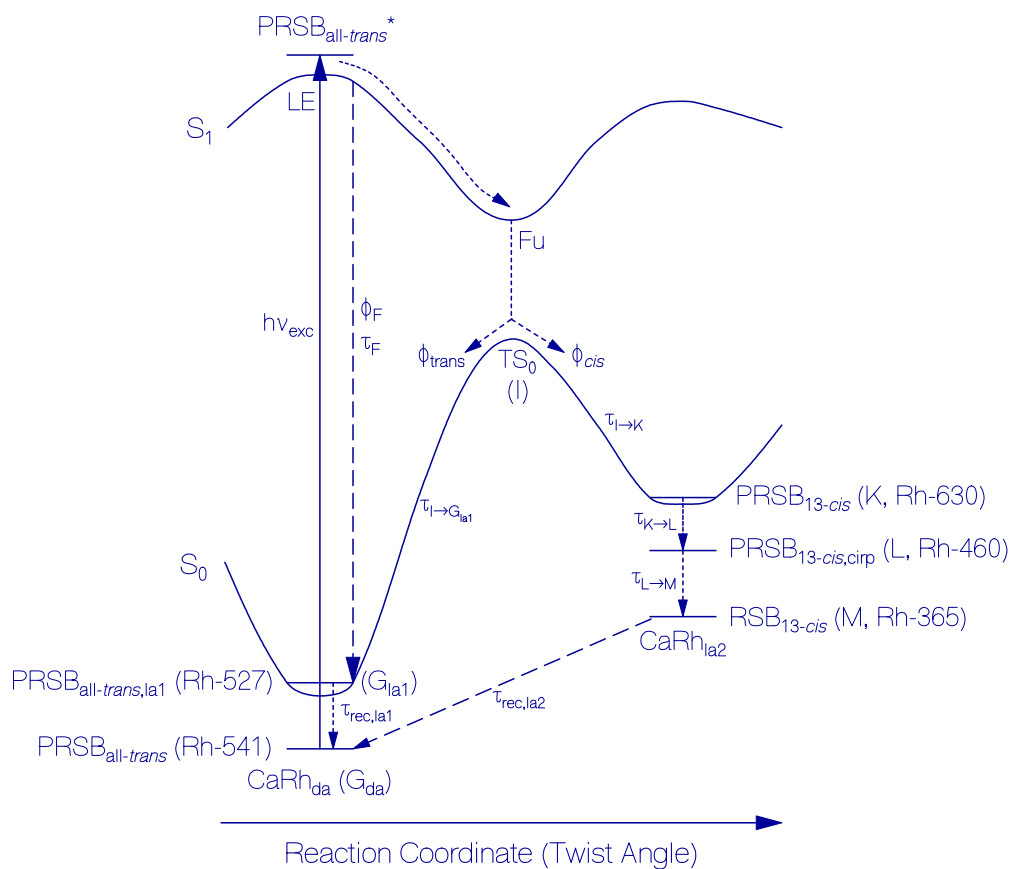

**Figure S5.** Schematic reaction coordinate diagram for primary photocycle of CaRh in pH 7.3 HEPES/MOPS buffer.

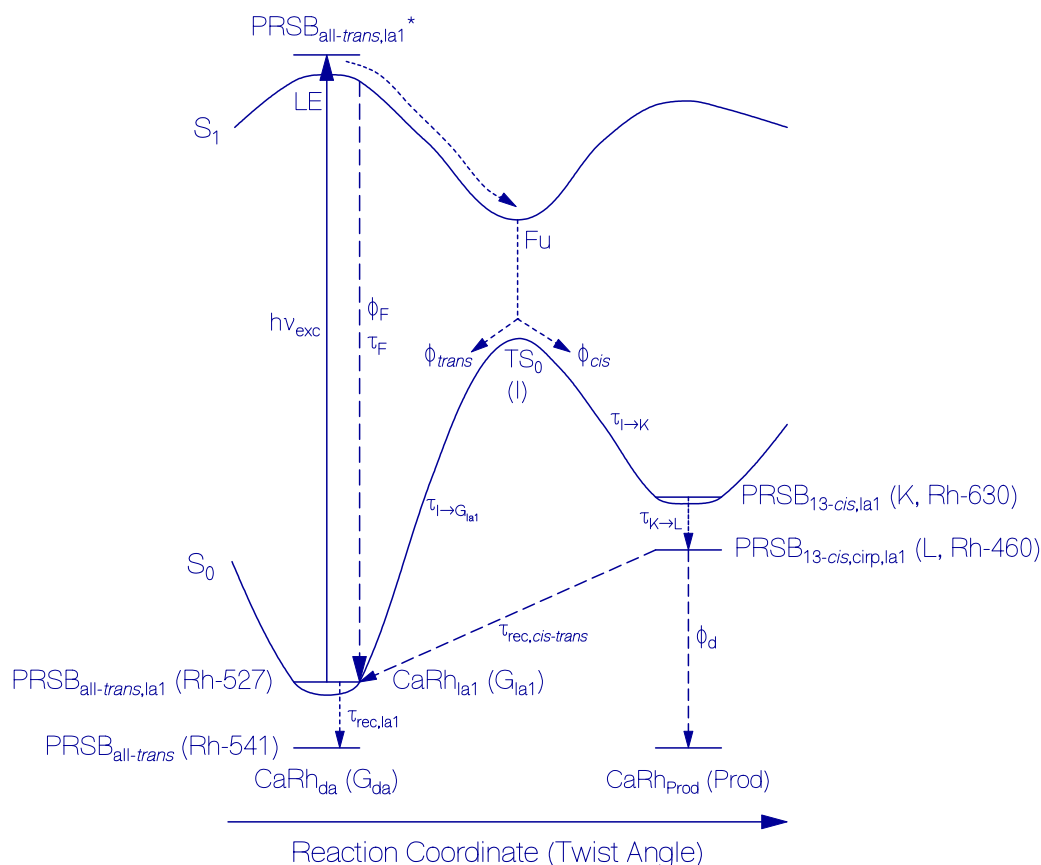

**Figure S6.** Schematic reaction coordinate diagram for secondary photocycle of CaRh in pH 7.3 HEPES/MOPS buffer.

## References

- S1. Honig, B.; Dinur, U.; Birge, R.R.; Ebrey, T.G. The isomer dependence of oscillator strengths in retinal and related molecules. Spectroscopic assignments. *J. Am. Chem. Soc.* **1980**, *102*, 488–494.
- S2. Penzkofer, A.; Stierl, M.; Hegemann, P.; Kateriya, S. Absorption and fluorescence characteristics of photo-activated adenylate cyclase nano-clusters from the amoebflagellate *Nagleria gruberi* NEG-M strain. *Chem. Phys.* **2012**, *392*, 46–54.
- S3. Fischer, H.; Polikarpov, I.; Craievich, A. Average protein density is a molecular-weight-dependent function. *Protein Sci.* **2004**, *13*, 825–828.
- S4. Barer, R.; Tkaczyk, S. Refractive index of concentrated protein solutions. *Nature* **1954**, *173*, 821–822.
- S5. Penzkofer, A.; Stierl, M.; Mathes, T.; Hegemann, P. Absorption and emission spectroscopic characterization of photo-dynamics of photoactivated adenylyl cyclase mutant bPAC-Y7F of *Beggiatoa* sp. *J. Photochem. Photobiol. B Biol.* **2014**, *140*, 182–193.
